# Supplementary material for: Analysis of the Complete Mitochondrial Genome Sequence of the Diploid CottonGossypium raimondiiby Comparative Genomics Approaches
Source: Hindawi journal article supplement (doi:10.1155/2016/5040598), 2016-01-01
Supplement: f1 [file 5040598.f1.zip]

Gossypium raimondii mitochondrion: 22 kbp from Gossypium\_raimon:7,000..28,999

Browser

Select Tracks

Snapshots

Community Tracks

Custom Tracks

Preferences

Search

Landmark or Region:

Gossypium\_raimon:7,000..28,999

Search

Annotate Restriction Sites

Configure...

Go

Examples:

Gossypium\_raimon

Gossypium\_raimon:80000..120000

atp1

nad4L

Data Source

Gossypium raimondii mitochondrion

Scroll/Zoom: << < — Show 22 kbp + > >> ☐ Flip

Overview

Centromeres

Region

0k

10k

20k

30k

40k

50k

60k

70k

80k

90k

100k

110k

120k

130k

140k

150k

160k

170k

180k

190k

200k

GC Content

% gc

54%

36%

Details

5 kbp

6k

7k

8k

9k

10k

11k

12k

13k

14k

15k

16k

17k

18k

19k

20k

21k

22k

23k

24k

25k

26k

27k

28k

29k

30k

Named gene

mFC

trnM(CAU)

trnM(CAU) (trnM(CAU))

rrn26

CDS

mFC reading frame

trnM(CAU) reading frame

trnM(CAU) reading frame

rrn26 reading frame

tRNAs

trnM(CAU)

trnM(CAU)

Transposons

Select Tracks

Clear highlighting

The Generic Genome Browser. For questions about the data at this site, please contact its webmaster. For support of the browser software *only*, send email to [gmod-gbrowse@lists.sourceforge.net](mailto:gmod-gbrowse@lists.sourceforge.net) or visit the [GMOD Project](#) web pages.
