# Supplementary material for: Analysis of the Complete Mitochondrial Genome Sequence of the Diploid CottonGossypium raimondiiby Comparative Genomics Approaches
Source: Hindawi journal article supplement (doi:10.1155/2016/5040598), 2016-01-01
Supplement: f1 [file 5040598.f1.zip]

**Table S1. Assembled contigs of *G. raimondii* mt genome.**

| No.           | Name        | Coverage                             | Number of reads | Length (bp) |
|---------------|-------------|--------------------------------------|-----------------|-------------|
| 1             | Contig00001 | 21.9                                 | 6,065           | 120,130     |
| 2             | Contig00002 | 21.8                                 | 5,443           | 108,274     |
| 3             | Contig00003 | 24.7                                 | 3,717           | 64,657      |
| 4             | Contig00004 | 42.7                                 | 88              | 467         |
| 5             | Contig00005 | 21.1                                 | 2,857           | 58,606      |
| 6             | Contig00006 | 18.5                                 | 115             | 1,228       |
| 7             | Contig00007 | 29.4                                 | 1,366           | 31,473      |
| 8             | Contig00008 | 26.7                                 | 3,189           | 50,925      |
| 9             | Contig00013 | 17.4                                 | 1,086           | 26,278      |
| 10            | Contig00014 | 24.2                                 | 1,398           | 24,777      |
| 11            | Contig00015 | 20.5                                 | 1,124           | 24,018      |
| 12            | Contig00016 | 20.3                                 | 879             | 18,803      |
| 13            | Contig00017 | 20.3                                 | 634             | 13,039      |
| 14            | Contig00018 | 41.1                                 | 1,232           | 12,608      |
| 15            | Contig00019 | 39.7                                 | 1,015           | 10,618      |
| 16            | Contig00021 | 49.4                                 | 1,090           | 9,120       |
| 17            | Contig00022 | 23.8                                 | 493             | 8,741       |
| 18            | Contig01360 | 327                                  | 2,047           | 2,186       |
| 19            | Contig03897 | 16.7                                 | 85              | 1,763       |
| 20            | Contig18936 | 295                                  | 1,115           | 1,153       |
| 21            | Contig90952 | 37.1                                 | 65              | 325         |
| Total/Average |             | 54.3 <sup>a</sup> /27.2 <sup>b</sup> | 35,103          | 589,198     |

<sup>a</sup>The average coverage of all aligned contigs.

<sup>b</sup>The average coverage of 19 aligned contigs without two cp-derived contigs: contig01360 and contig18936.
