# Supplementary material for: Analysis of the Complete Mitochondrial Genome Sequence of the Diploid CottonGossypium raimondiiby Comparative Genomics Approaches
Source: Hindawi journal article supplement (doi:10.1155/2016/5040598), 2016-01-01
Supplement: f1 [file 5040598.f1.zip]

**Table S3. Characteristics of protein-coding genes in *G. raimondii* mt genome.**

| Gene name | Length (bp) | Start codon    | Stop codon |
|-----------|-------------|----------------|------------|
| atp1      | 1524        | ATG            | TGA        |
| atp4      | 585         | ATG            | TGA        |
| atp6      | 816         | ATG            | TGA        |
| atp8      | 465         | ATG            | TAG        |
| atp9      | 312         | ATG            | TAA        |
| ccmB      | 621         | ATG            | TGA        |
| ccmC      | 753         | ATG            | TGA        |
| ccmFc     | 1353        | ATG            | TAA        |
| ccmFn     | 1737        | ATG            | TGA        |
| cob       | 1179        | ATG            | TGA        |
| cox1      | 1593        | ATG            | TAA        |
| cox2      | 783         | ATG            | TAA        |
| cox3      | 798         | ATG            | TGA        |
| matR      | 1968        | ATG            | TAG        |
| mttB      | 801         | Not determined | TAG        |
| nad1      | 978         | ACG            | TAA        |
| nad2      | 1467        | ATG            | TAA        |
| nad3      | 357         | ATG            | TAA        |
| nad4      | 1488        | ATG            | TGA        |
| nad4L     | 303         | ACG            | TAA        |
| nad5      | 2013        | ATG            | TAA        |
| nad6      | 621         | ATG            | TAA        |
| nad7      | 1185        | ATG            | TAG        |
| nad9      | 573         | ATG            | TAA        |
| rpl2      | 1005        | ATG            | TAA        |
| rpl5      | 582         | ATG            | TAG        |
| rpl10     | 489         | ATG            | TAA        |
| rpl16     | 435         | Not determined | TAA        |
| rps3      | 1707        | ATG            | TAG        |
| rps4      | 1098        | ATG            | TAA        |
| rps7      | 447         | ATG            | TAA        |
| rps10     | 333         | ACG            | CGA        |
| rps12     | 372         | ATG            | TAG        |
| rps14     | 303         | ATG            | TAG        |
| sdh3      | 435         | ATG            | TAG        |
| sdh4      | 399         | ATG            | TGA        |
