# Supplementary material for: Analysis of the Complete Mitochondrial Genome Sequence of the Diploid CottonGossypium raimondiiby Comparative Genomics Approaches
Source: Hindawi journal article supplement (doi:10.1155/2016/5040598), 2016-01-01
Supplement: f1 [file 5040598.f1.zip]

**Table S5. Location of mt-like nuclear tRNA genes in *G. raimondii* nuclear genome**

| <b>tRNA</b>        | <b>Chr</b> | <b>Identity</b> | <b>Length (bp)</b> | <b>Start</b> | <b>End</b> |
|--------------------|------------|-----------------|--------------------|--------------|------------|
| <b>trnW-CCA</b>    | 1          | 100             | 74                 | 23,186,930   | 23,186,857 |
| <b>trnS-GGA</b>    | 1          | 100             | 87                 | 23,199,416   | 23,199,330 |
| <b>trnS-GCT</b>    | 1          | 100             | 88                 | 23,231,316   | 23,231,229 |
| <b>trnF-GAA</b>    | 1          | 100             | 74                 | 23,231,737   | 23,231,664 |
| <b>trnP-UGG</b>    | 1          | 98.68           | 76                 | 23,232,031   | 23,231,957 |
| <b>trnM-CAU-1</b>  | 1          | 100             | 81                 | 23,342,432   | 23,342,512 |
| <b>trnM-CAU-cp</b> | 1          | 100             | 73                 | 23,419,701   | 23,419,629 |
| <b>trnM-CAU-2</b>  | 1          | 100             | 73                 | 23,450,444   | 23,450,372 |
| <b>trnW-CCA</b>    | 1          | 98.65           | 74                 | 23,474,675   | 23,474,748 |
| <b>trnV-GAC</b>    | 1          | 98.61           | 72                 | 23,483,961   | 23,483,890 |
| <b>trnY-GUA</b>    | 1          | 100             | 83                 | 23,549,199   | 23,549,117 |
| <b>trnN-GUU</b>    | 1          | 100             | 72                 | 23,550,166   | 23,550,095 |
| <b>trnC-GCA</b>    | 1          | 100             | 71                 | 23,552,368   | 23,552,298 |
| <b>trnE-UUC</b>    | 1          | 100             | 72                 | 23,580,669   | 23,580,598 |
| <b>trnH-GUG</b>    | 1          | 100             | 74                 | 23,582,754   | 23,582,681 |
| <b>trnS-UGA</b>    | 1          | 100             | 87                 | 23,616,081   | 23,615,995 |
| <b>trnK-UUU</b>    | 1          | 100             | 73                 | 23,616,989   | 23,616,917 |
| <b>trnG-GCC</b>    | 1          | 100             | 72                 | 23,645,773   | 23,645,702 |
| <b>trnM-CAU-2</b>  | 1          | 98.63           | 73                 | 23,651,459   | 23,651,387 |
| <b>trnI-UAU</b>    | 1          | 100             | 86                 | 23,661,010   | 23,660,925 |
| <b>trnD-GUC</b>    | 1          | 100             | 74                 | 23,676,388   | 23,676,315 |
| <b>trnQ-UUG</b>    | 1          | 100             | 72                 | 23,818,761   | 23,818,690 |
| <b>trnH-GUG</b>    | 1          | 93.06           | 72                 | 42,544,620   | 42,544,549 |
| <b>trnH-GUG</b>    | 2          | 92              | 75                 | 26,982,032   | 26,981,959 |
| <b>trnM-CAU-2</b>  | 2          | 95.89           | 73                 | 52,875,794   | 52,875,722 |
| <b>trnM-CAU-2</b>  | 3          | 90.41           | 73                 | 13,883,827   | 13,883,756 |
| <b>trnD-GUC</b>    | 4          | 98.61           | 72                 | 3,555,795    | 3,555,866  |
| <b>trnS-GGA</b>    | 4          | 92.86           | 84                 | 32,001,956   | 32,001,873 |
| <b>trnS-GGA</b>    | 5          | 95.35           | 86                 | 7,648,967    | 7,649,052  |
| <b>trnW-CCA</b>    | 5          | 94.59           | 74                 | 49,260,616   | 49,260,689 |
| <b>trnM-CAU-2</b>  | 5          | 94.52           | 73                 | 60,057,635   | 60,057,707 |
| <b>trnD-GUC</b>    | 7          | 93.24           | 74                 | 13,216,197   | 13,216,124 |
| <b>trnK-UUU</b>    | 7          | 98.63           | 73                 | 22,092,280   | 22,092,208 |
| <b>trnS-GGA</b>    | 7          | 91.76           | 85                 | 24,488,177   | 24,488,093 |
| <b>trnM-CAU-cp</b> | 7          | 98.59           | 71                 | 44,344,852   | 44,344,922 |
| <b>trnS-GGA</b>    | 8          | 96.55           | 87                 | 26,955,720   | 26,955,634 |
| <b>trnM-CAU-2</b>  | 9          | 95.89           | 73                 | 22,125,081   | 22,125,153 |
| <b>trnM-CAU-2</b>  | 10         | 91.43           | 70                 | 28,957,917   | 28,957,848 |
| <b>trnS-GGA</b>    | 11         | 94.32           | 88                 | 24,281,095   | 24,281,009 |
| <b>trnS-GGA</b>    | 13         | 89.66           | 87                 | 16,190,205   | 16,190,119 |
| <b>trnQ-UUG</b>    | 13         | 94.2            | 69                 | 23,940,068   | 23,940,000 |
| <b>trnW-CCA</b>    | 13         | 100             | 74                 | 36,753,933   | 36,753,860 |
| <b>trnM-CAU-1</b>  | 13         | 97.53           | 81                 | 52,706,781   | 52,706,701 |
| <b>trnS-GGA</b>    | 13         | 97.7            | 87                 | 52,748,418   | 52,748,504 |
