# Supplementary material for: Analysis of the Complete Mitochondrial Genome Sequence of the Diploid CottonGossypium raimondiiby Comparative Genomics Approaches
Source: Hindawi journal article supplement (doi:10.1155/2016/5040598), 2016-01-01
Supplement: f1 [file 5040598.f1.zip]

**Table S6. Syntenic blocks ( >10 kb) between mitochondria and Chr1 of *G.******raimondii***

| <b>Blocks</b> | <b>mt-position</b> | <b>Chr1-position</b>  | <b>Length in<br/>mt (bp)</b> | <b>Length in<br/>Chr1 (bp)</b> | <b>Identity<br/>(%)</b> |
|---------------|--------------------|-----------------------|------------------------------|--------------------------------|-------------------------|
| <b>1</b>      | 1-13,278           | 23,331,615-23,344,875 | 13,277                       | 13,260                         | 99.77                   |
| <b>2</b>      | 13,350-27,098      | 23,408,453-23,422,197 | 13,748                       | 13,744                         | 99.85                   |
| <b>3</b>      | 27,165-51,465      | 23,359,437-23,383,728 | 24,300                       | 24,291                         | 99.91                   |
| <b>4</b>      | 62,936-78,313      | 23,716,498-23,701,124 | 15,377                       | 15,374                         | 99.92                   |
| <b>5</b>      | 78,612-114,784     | 23,698,082-23,661,873 | 36,172                       | 36,209                         | 99.76                   |
| <b>6</b>      | 132,777-145,613    | 23,643,790-23,630,961 | 12,836                       | 12,829                         | 99.69                   |
| <b>7</b>      | 145,617-172,760    | 23,627,743-23,600,604 | 27,143                       | 27,139                         | 99.74                   |
| <b>8</b>      | 181,824-249,203    | 23,590,722-23,523,424 | 67,379                       | 67,298                         | 99.8                    |
| <b>9</b>      | 257,310-379,589    | 23,313,389-23,191,266 | 122,279                      | 122,123                        | 99.78                   |
| <b>10</b>     | 380,292-406,785    | 23,190,736-23,164,259 | 26,493                       | 26,477                         | 99.84                   |
| <b>11</b>     | 405,991-499,666    | 23,523,070-23,429,471 | 93,675                       | 93,599                         | 99.84                   |
| <b>12</b>     | 514,181-529,554    | 23,716,498-23,701,124 | 15,373                       | 15,374                         | 99.95                   |
| <b>13</b>     | 529,853-566,976    | 23,698,082-23,660,885 | 37,123                       | 37,197                         | 99.89                   |
| <b>14</b>     | 567,176-583,538    | 23,660,784-23,644,424 | 16,362                       | 16,360                         | 99.9                    |
| <b>15</b>     | 583,670-597,702    | 23,819,545-23,805,513 | 14,032                       | 14,032                         | 99.94                   |
| <b>16</b>     | 598,078-676,078    | 23,805,143-23,727,131 | 78,000                       | 78,012                         | 99.89                   |
