# Supplementary material for: Analysis of the Complete Mitochondrial Genome Sequence of the Diploid CottonGossypium raimondiiby Comparative Genomics Approaches
Source: Hindawi journal article supplement (doi:10.1155/2016/5040598), 2016-01-01
Supplement: f1 [file 5040598.f1.zip]

**Table S4. Location of mt-like nuclear genes in *G. raimondii* nuclear genome**

| <b>Gene</b>    | <b>Chr</b> | <b>Identity(%)</b> | <b>Length (bp)</b> | <b>Start</b> | <b>End</b> |
|----------------|------------|--------------------|--------------------|--------------|------------|
| <b>atp1</b>    | 13         | 100                | 1,524              | 52,729,180   | 52,727,657 |
| <b>atp4</b>    | 1          | 100                | 585                | 23,747,038   | 23,746,454 |
| <b>atp6</b>    | 1          | 100                | 816                | 23,193,243   | 23,192,428 |
| <b>atp8</b>    | 1          | 99.57              | 465                | 23,513,264   | 23,512,802 |
| <b>atp9</b>    | 1          | 99.36              | 312                | 23,451,543   | 23,451,234 |
| <b>ccmB</b>    | 1          | 99.03              | 621                | 23,619,970   | 23,619,356 |
| <b>ccmC</b>    | 1          | 100                | 753                | 23,661,749   | 23,660,997 |
| <b>ccmFc-1</b> | 1          | 100                | 773                | 23,336,664   | 23,337,436 |
| <b>ccmFc-1</b> | 2          | 95.21              | 773                | 25,345,205   | 25,344,434 |
| <b>ccmFc-1</b> | 13         | 98.06              | 773                | 52,712,549   | 52,711,777 |
| <b>ccmFc-2</b> | 1          | 100                | 580                | 23,338,392   | 23,338,971 |
| <b>ccmFc-2</b> | 2          | 94.88              | 566                | 25,343,482   | 25,342,917 |
| <b>ccmFc-2</b> | 13         | 94.01              | 484                | 36,216,514   | 36,216,033 |
| <b>ccmFc-2</b> | 13         | 97.07              | 580                | 52,710,823   | 52,710,246 |
| <b>ccmFn</b>   | 1          | 100                | 1,737              | 23,180,873   | 23,179,137 |
| <b>ccmFn</b>   | 13         | 96.32              | 1,737              | 36,747,505   | 36,745,815 |
| <b>cob</b>     | 1          | 99.92              | 1,179              | 23,296,849   | 23,295,671 |
| <b>cox1</b>    | 1          | 100                | 1,593              | 23,367,206   | 23,368,798 |
| <b>cox1</b>    | 13         | 98.49              | 1,593              | 52,744,877   | 52,743,285 |
| <b>cox2-1</b>  | 1          | 100                | 698                | 23,267,015   | 23,266,318 |
| <b>cox2-2</b>  | 1          | 100                | 85                 | 23,264,813   | 23,264,729 |
| <b>cox3</b>    | 1          | 99.62              | 798                | 23,364,995   | 23,365,791 |
| <b>cox3</b>    | 13         | 98.12              | 798                | 52,746,969   | 52,746,172 |
| <b>matR</b>    | 1          | 99.9               | 1,968              | 23,608,530   | 23,606,565 |
| <b>matR</b>    | 5          | 97.17              | 1,023              | 17,921,974   | 17,922,994 |
| <b>mttB</b>    | 1          | 100                | 801                | 23,693,899   | 23,693,099 |
| <b>nad1-1</b>  | 1          | 100                | 387                | 23,500,432   | 23,500,046 |
| <b>nad1-1</b>  | 13         | 98.19              | 387                | 52,691,726   | 52,692,112 |
| <b>nad1-2</b>  | 1          | 100                | 81                 | 23,233,466   | 23,233,386 |
| <b>nad1-3</b>  | 1          | 100                | 192                | 23,234,623   | 23,234,432 |
| <b>nad1-3</b>  | 10         | 91.05              | 190                | 15,060,569   | 15,060,758 |
| <b>nad1-4</b>  | 1          | 98.31              | 59                 | 23,609,249   | 23,609,192 |
| <b>nad1-4</b>  | 10         | 96.43              | 56                 | 30,338,062   | 30,338,117 |
| <b>nad1-5</b>  | 1          | 100                | 259                | 23,605,759   | 23,605,501 |
| <b>nad2-1</b>  | 1          | 100                | 153                | 23,757,694   | 23,757,542 |
| <b>nad2-1</b>  | 5          | 96.08              | 153                | 17,810,435   | 17,810,586 |
| <b>nad2-2</b>  | 1          | 100                | 392                | 23,759,308   | 23,758,917 |
| <b>nad2-3</b>  | 1          | 100                | 161                | 23,548,599   | 23,548,439 |
| <b>nad2-4</b>  | 1          | 100                | 572                | 23,545,975   | 23,545,404 |
| <b>nad2-5</b>  | 1          | 100                | 189                | 23,544,056   | 23,543,868 |
| <b>nad4-1</b>  | 1          | 100                | 460                | 23,680,296   | 23,679,837 |
| <b>nad4-2</b>  | 1          | 100                | 516                | 23,682,240   | 23,681,725 |
| <b>nad4-3</b>  | 1          | 100                | 423                | 23,685,581   | 23,685,159 |
| <b>nad4-4</b>  | 1          | 100                | 89                 | 23,688,398   | 23,688,310 |
| <b>nad4L</b>   | 1          | 100                | 303                | 23,220,667   | 23,220,365 |
| <b>nad5-1</b>  | 1          | 100                | 230                | 23,451,993   | 23,451,764 |
| <b>nad5-2</b>  | 1          | 99.92              | 1,216              | 23,454,061   | 23,452,847 |
| <b>nad5-3</b>  | 1          | 100                | 22                 | 23,308,844   | 23,308,865 |
| <b>nad5-4</b>  | 1          | 100                | 395                | 23,775,754   | 23,775,360 |
| <b>nad5-5</b>  | 1          | 100                | 150                | 23,776,835   | 23,776,686 |

|                |    |       |       |            |            |
|----------------|----|-------|-------|------------|------------|
| <b>nad6</b>    | 1  | 100   | 621   | 23,798,988 | 23,798,368 |
| <b>nad7-1</b>  | 8  | 87.41 | 143   | 16,453,527 | 16,453,669 |
| <b>nad7-2</b>  | 9  | 94.2  | 69    | 10,966,040 | 10,965,972 |
| <b>nad9</b>    | 1  | 100   | 573   | 23,692,342 | 23,692,914 |
| <b>rpl10</b>   | 1  | 100   | 489   | 23,479,164 | 23,478,676 |
| <b>rpl16</b>   | 1  | 100   | 435   | 23,251,791 | 23,251,357 |
| <b>rpl2</b>    | 1  | 99.9  | 1,005 | 23,312,065 | 23,311,062 |
| <b>rpl5</b>    | 1  | 99.66 | 582   | 23,310,564 | 23,309,983 |
| <b>rpl5</b>    | 8  | 89.19 | 582   | 18,687,244 | 18,687,796 |
| <b>rps10-1</b> | 1  | 99.2  | 250   | 23,369,917 | 23,370,164 |
| <b>rps10-1</b> | 13 | 97.58 | 248   | 52,742,208 | 52,741,961 |
| <b>rps10-2</b> | 1  | 100   | 83    | 23,368,985 | 23,369,067 |
| <b>rps10-2</b> | 13 | 97.59 | 83    | 52,743,099 | 52,743,017 |
| <b>rps14</b>   | 1  | 99.67 | 303   | 23,294,320 | 23,294,019 |
| <b>rps3-1</b>  | 1  | 100   | 75    | 23,248,065 | 23,247,991 |
| <b>rps3-2</b>  | 1  | 99.69 | 1,632 | 23,251,385 | 23,249,758 |
| <b>rps4</b>    | 1  | 99.27 | 1,098 | 23,279,262 | 23,278,173 |
| <b>rps7</b>    | 1  | 99.78 | 447   | 23,587,982 | 23,587,537 |
| <b>sdh3</b>    | 1  | 100   | 435   | 23,756,635 | 23,756,201 |
| <b>sdh4</b>    | 1  | 100   | 399   | 23,364,669 | 23,365,067 |

---
