# Supplementary material for: Analysis of the Complete Mitochondrial Genome Sequence of the Diploid Cotton Gossypium raimondii by Comparative Genomics Approaches
Source: Biomed Res Int. 2016 Oct 25;2016:5040598. doi: 10.1155/2016/5040598 (PMC5099484; doi:10.1155/2016/5040598)
Supplement: Supplementary file 1 — Supplementary Figure S1. The GBrowse of the Gossypium raimondii mt genome. Supplementary Figure S2. NJ tree based on 23 conserved protein-coding genes of 30 representative higher plant mt genomes. Supplementary Table S1. Assembled contigs of G. raimondii mt genome. Supplementary Table S2. Gene content and characteristic comparison of 23 plant mt genomes. Supplementary Table S3. Characteristics of protein-coding genes in G. raimondii mt genome. Supplementary Table S4. Location of mt-like nuclear genes in G. raimondii nuclear genome. Supplementary Table S5. Location of mt-like nuclear tRNA genes in G. raimondii nuclear genome. Supplementary Table S6. Syntenic blocks (>10 kb) between mitochondria and Chr1 of G. raimondii. [file 5040598.f1.zip]

Archive with 21 entries (18 files):
- Supplementary file/
- Supplementary file/.DS_Store
- __MACOSX/
- __MACOSX/Supplementary file/
- __MACOSX/Supplementary file/._.DS_Store
- Supplementary file/Figure S1.pdf
- __MACOSX/Supplementary file/._Figure S1.pdf
- Supplementary file/Figure S2.pdf
- __MACOSX/Supplementary file/._Figure S2.pdf
- Supplementary file/Table S1.pdf
- __MACOSX/Supplementary file/._Table S1.pdf
- Supplementary file/Table S2.xlsx
- __MACOSX/Supplementary file/._Table S2.xlsx
- Supplementary file/Table S3.pdf
- __MACOSX/Supplementary file/._Table S3.pdf
- Supplementary file/Table S4.pdf
- __MACOSX/Supplementary file/._Table S4.pdf
- Supplementary file/Table S5.pdf
- __MACOSX/Supplementary file/._Table S5.pdf
- Supplementary file/Table S6.pdf
- __MACOSX/Supplementary file/._Table S6.pdf
