# Supplementary material for: Analysis of the Complete Mitochondrial Genome Sequence of the Diploid Cotton Gossypium raimondii by Comparative Genomics Approaches
Source: Biomed Res Int. 2016 Oct 25;2016:5040598. doi: 10.1155/2016/5040598 (PMC5099484; doi:10.1155/2016/5040598)
Supplement: Supplementary file 1 — Supplementary Figure S1. The GBrowse of the Gossypium raimondii mt genome. Supplementary Figure S2. NJ tree based on 23 conserved protein-coding genes of 30 representative higher plant mt genomes. Supplementary Table S1. Assembled contigs of G. raimondii mt genome. Supplementary Table S2. Gene content and characteristic comparison of 23 plant mt genomes. Supplementary Table S3. Characteristics of protein-coding genes in G. raimondii mt genome. Supplementary Table S4. Location of mt-like nuclear genes in G. raimondii nuclear genome. Supplementary Table S5. Location of mt-like nuclear tRNA genes in G. raimondii nuclear genome. Supplementary Table S6. Syntenic blocks (>10 kb) between mitochondria and Chr1 of G. raimondii. [file 5040598.f1.zip › Supplementary file/Table S2.xlsx]

## Sheet: 工作表1
Table S2: Gene content and characteristic comparison of 23 plant mt genomes
	Gene	Malvales				Brassicales		Cucurbitales		Fabales		Rosales	Vitales	Gentianales	Lamiales	Solanales		Poales				Cycadales	Ginkgoales	Marchantiaceae
		G. raimondii	G. barbadense	G. harknessii	G. hirsutum	A. thaliana	B. napus	C. lanatus	C. sativus	G. max	M. truncatula	M. domestica	V. vinifera	A. syriaca	A. reptans	C. annuum	N. tabacum	O. sativa	S. bicolor	T. aestivum	Z. mays	C. taitungensis	G. biloba	M. polymorpha
	GenBank Accession Number	KU317325	NC_028254.1	NC_027407.1	NC_027406.1	NC_001284.2	NC_008285.1	NC_014043.1	NC_016005.1	NC_020455.1	NC_029641.1	NC_018554.1	NC_012119.1	NC_022796.1	NC_023103.1	NC_024624.1	NC_006581.1	NC_007886.1	NC_008360.1	NC_007579.1	NC_007982.1	NC_010303.1	NC_027976.1	NC_001660.1
	Size (bp)	676078	677434	666081	668584	366924	221853	379236	1555935	402558	271618	396947	773279	682498	352069	511,53	430597	491515	468628	452528	680603	414903	346544	186609
	GC content (％)	44.95	44.98	44.98	44.98	44.77	45.19	45.08	44.27	45.03	45.39	45.4	44.14	43.43	45.1	44.52	44.96	43.85	43.73	44.35	43.93	46.92	50.36	42.41
Complex I	nad1	+	+	+	+	+	+	+	+	+	+	+	+	+	+	+	+	+	+	+	+	+	+	+
	nad2	+	+	+	+	+	+	+	+	+	+	+	+	+	+	+	+	+	+	+	+	+	+	+
	nad3	+	+	+	+	+	+	+	+	+	+	+	+	+	+	+	+	+	+	+	+	+	+	+
	nad4	+	+	+	+	+	+	+	+	+	+	+	+	+	+	+	+	+	+	+	+	+	+	+
	nad4L	+	+	+	+	+	+	+	+	+	+	+	+	+	+	+	+	+	+	+	+	+	+	+
	nad5	+	+	+	+	+	+	+	+	+	+	+	+	+	+	+	+	+	+	+	+	+	+	+
	nad6	+	+	+	+	+	+	+	+	+	+	+	+	+	+	+	+	+	+	+	+	+	+	+
	nad7	+	+	+	+	+	+	+	+	+	+	+	+	+	+	+	+	+	+	+	+	+	+	-
	nad9	+	+	+	+	+	+	+	+	+	+	+	+	+	+	+	+	+	+	+	+	+	+	+
Complex II	sdh3	+	+	+	+	-	-	+	+	-	-	-	+	+	-	+	+	-	-	-	-	+	+	+
	sdh4	+	+	+	+	-	-	+	+	-	-	+	+	+	-	+	+	-	-	-	-	+	+	+
Complex III	cob	+	+	+	+	+	+	+	+	+	+	+	+	+	+	+	+	+	+	+	+	+	+	+
Complex IV	cox1	+	+	+	+	+	+	+	+	+	+	+	+	+	+	+	+	+	+	+	+	+	+	+
	cox2	+	+	+	+	+	+	+	+	+	-	+	+	+	+	+	+	+	+	+	+	+	+	+
	cox3	+	+	+	+	+	+	+	+	+	+	+	+	+	+	+	+	+	+	+	+	+	+	+
Complex V	atp1	+	+	+	+	+	+	+	+	+	+	+	+	+	+	+	+	+	+	+	+	+	+	+
	atp4	+	+	+	+	+	+	+	+	+	+	+	+	+	+	+	+	+	+	+	+	+	+	+
	atp6	+	+	+	+	+	+	+	+	+	+	+	+	-	+	+	+	+	+	+	+	+	+	+
	atp8	+	+	+	+	+	+	+	+	+	+	+	+	+	+	+	+	+	+	+	+	+	+	+
	atp9	+	+	+	+	+	+	+	+	+	+	+	+	+	+	+	+	+	+	+	+	+	+	+
Cytochrome c biogenesis	ccmB	+	+	+	+	+	+	+	+	+	+	+	+	+	+	+	+	+	+	+	+	+	+	+
	ccmC	+	+	+	+	+	+	+	+	+	+	+	+	+	+	+	+	+	+	+	+	+	+	+
	ccmFC	+	+	+	+	+	+	+	+	+	+	+	+	+	+	+	+	+	+	+	+	+	+	+
	ccmFN	+	+	+	+	+	+	+	+	+	+	+	+	+	+	+	+	+	+	+	+	+	+	+
Maturase	matR	+	+	+	+	+	+	+	+	+	+	+	+	+	+	+	+	+	+	+	+	+	+	+
Transport membrane protein	mttB	+	+	+	+	+	+	+	+	+	+	+	-	+	+	+	+	+	+	+	+	+	+	+
Ribosomal proteins	rpl2	+	+	+	+	+	+	+	+	-	-	-	+	+	+	+	+	+	-	-	-	+	+	+
	rpl5	+	+	+	+	+	+	+	+	+	+	+	+	+	-	+	+	+	-	+	-	+	+	+
	rpl6	-	-	-	-	-	-	-	-	-	-	-	-	-	-	-	-	-	-	-	-	-	-	+
	rpl10	+	+	+	-	-	-	+	+	-	-	-	-	+	-	+	-	-	-	-	-	-	-	-
	rpl14	-	-	-	-	-	-	-	-	-	-	-	-	-	-	-	-	-	-	-	-	-	-	-
	rpl16	+	+	+	+	+	+	+	+	+	+	-	+	-	-	+	+	+	+	+	+	+	+	+
	rps1	-	-	-	-	-	-	+	+	+	+	+	+	+	-	-	+	+	+	+	+	+	+	+
	rps2	-	-	-	-	-	-	-	-	-	-	-	-	-	-	-	-	+	+	+	+	+	+	+
	rps3	+	+	+	+	+	+	+	+	+	+	+	+	+	+	+	+	+	+	+	+	+	+	+
	rps4	+	+	+	+	+	+	+	+	+	+	-	+	+	+	+	+	+	+	+	+	+	+	+
	rps7	+	+	+	+	+	+	+	+	-	-	-	+	+	-	-	-	+	+	+	+	+	+	+
	rps8	-	-	-	-	-	-	-	-	-	-	-	-	-	-	-	-	-	-	-	-	-	-	+
	rps10	+	+	+	+	-	-	+	+	+	+	-	+	+	-	+	+	-	-	-	-	+	+	+
	rps11	-	-	-	-	-	-	-	-	-	-	-	-	-	-	-	-	-	-	-	-	+	+	+
	rps12	+	+	+	+	+	+	+	+	+	+	+	+	+	+	+	+	+	+	+	+	+	+	+
	rps13	-	-	-	-	-	-	+	+	-	-	+	+	+	+	+	+	+	+	+	+	+	+	+
	rps14	+	+	+	+	-	+	-	-	+	+	+	+	-	-	-	+	-	-	-	-	+	+	+
	rps19	-	-	-	-	-	-	+	-	-	-	-	+	+	-	+	+	+	-	-	-	+	+	+
