# Supplementary figures and images for: Analysis of the Complete Mitochondrial Genome Sequence of the Diploid CottonGossypium raimondiiby Comparative Genomics Approaches
Source: Hindawi journal article supplement (doi:10.1155/2016/5040598), 2016-01-01

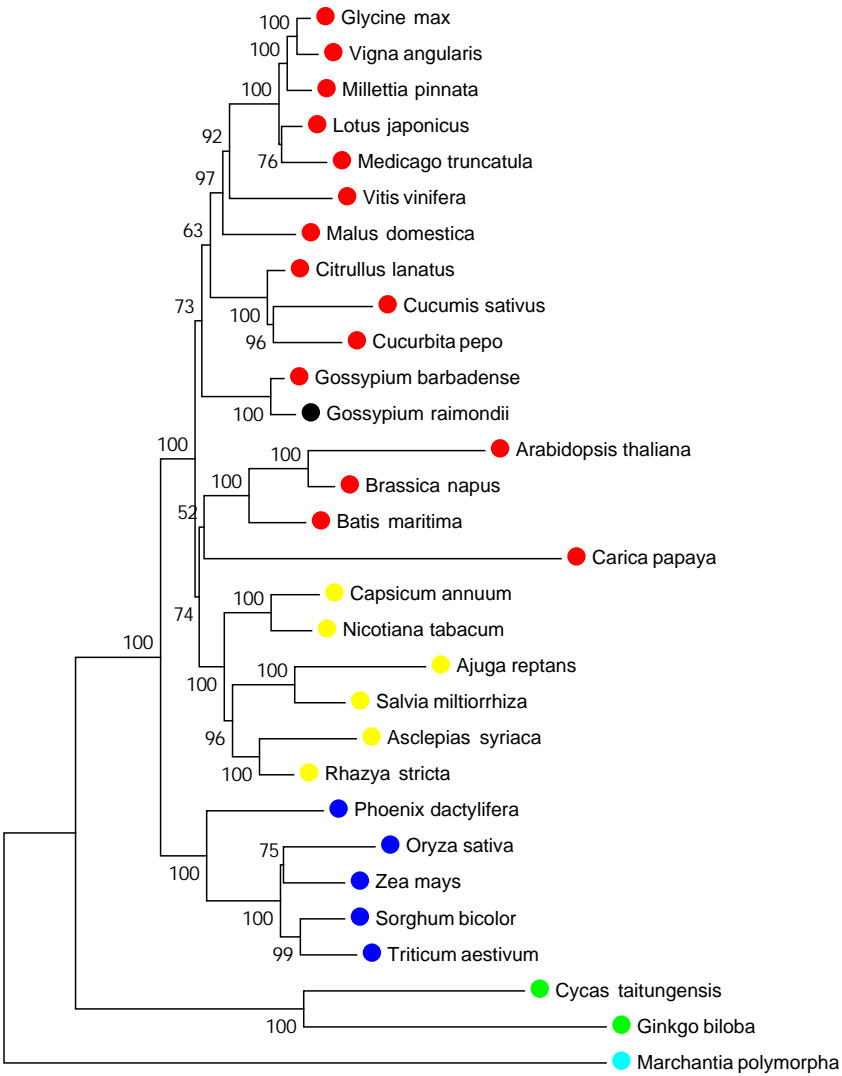

0.02

Supplement: f1 [file 5040598.f1.zip]
